# Supplementary material
Source: Springer Nature journal article supplement (https://www.springermedizin.de/resource/supplementary/12891_2014_2396_MOESM3_ESM.pdf/9510106)

Supplementary Figure 2. Gene-centric evaluation of differentially expressed leukocyte metagenes in the mouse (A-D) and human datasets (E&F).

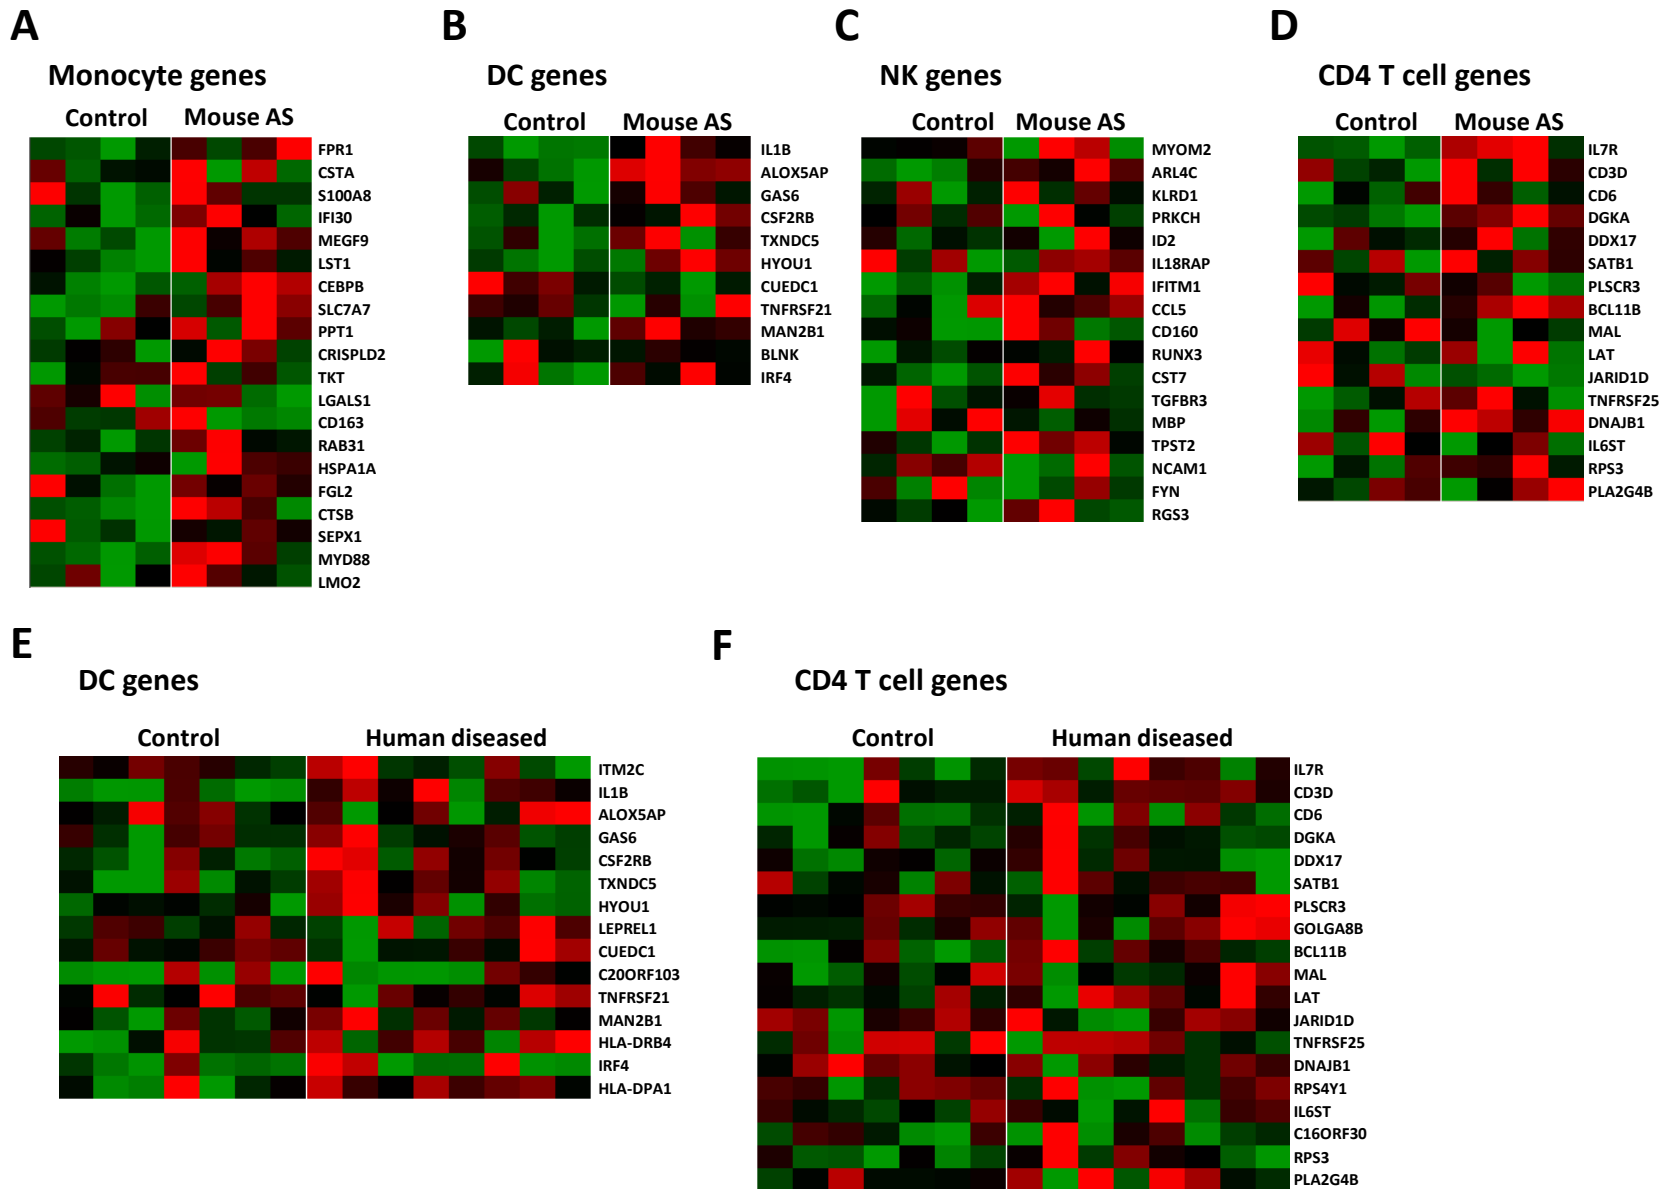

Supplement: MOESM3 [file 9510106]
